# Supplementary material for: Zirconia-free NaSICON solid electrolyte materials for sodium all-solid-state batteries
Source: Royal Society of Chemistry journal article supplement (doi:10.1039/d3ta04665f), 2023-01-01
Supplement: d3ta04665f1.pdf [file d3ta04665f1.pdf]

## —Electronic Supplementary Information— Zirconia-free NaSICON Solid Electrolyte Materials for Sodium All-solid-state Batteries

Aaron Jue Kang Tieu<sup>1#</sup>, Eunike Mahayoni<sup>2,3#</sup>, Yuheng Li<sup>1</sup>, Zeyu Deng<sup>1</sup>, François Fauth<sup>4</sup>, Jean-Noël Chotard<sup>2,3</sup>, Vincent Seznec<sup>2,3</sup>, Stefan Adams<sup>1▲</sup>, Christian Masquelier<sup>2,3,5†</sup>, Pieremanuele Canepa<sup>1,6,7\*</sup>

<sup>1</sup>Department of Materials Science and Engineering, National University of Singapore,  
College of Design and Engineering, Singapore 117575

<sup>2</sup>Laboratoire de Réactivité et de Chimie des Solides (LRCS), CNRS UMR 7314,  
Université de Picardie Jules Verne, 80039 Amiens Cedex, France

<sup>3</sup>RS2E, Réseau Français sur le Stockage Electrochimique de l'Energie, FR CNRS  
3459, F-80039 Amiens Cedex 1, France

<sup>4</sup>CELLS-ALBA Synchrotron, Cerdanyola del Vallès, E-08290 Barcelona, Spain

<sup>5</sup>ALISTORE-ERI European Research Institute, FR CNRS 3104, Amiens, F-80039  
Cedex 1, France

<sup>6</sup>Department of Electrical and Computer Engineering, Houston, Texas 77204, United  
States

<sup>7</sup>Texas Center for Superconductivity, University of Houston, Houston, TX, 77204,  
USA

▲E-mail: [mseasn@nus.edu.sg](mailto:mseasn@nus.edu.sg)

†E-mail: [christian.masquelier@u-picardie.fr](mailto:christian.masquelier@u-picardie.fr)

\*E-mail: [pcanepa@uh.edu](mailto:pcanepa@uh.edu)

#These authors contributed equally

## S1 Characterization of NaSICON materials

*Synthesis of  $\text{Na}_3\text{V}_2(\text{PO}_4)_3$  electrode material:* The electrode active material  $\text{Na}_3\text{V}_2(\text{PO}_4)_3$  (NVP) is synthesized via solid-state reaction<sup>1</sup>.  $\text{NH}_4\text{VO}_3$  (99%, Sigma-Aldrich) and  $\text{NaH}_2\text{PO}_4$  (99%, Sigma-Aldrich) were mixed in water at 333 K overnight where the solvent was evaporated slowly. The mixture was then slowly heated to 573 K under air to mitigate the volumetric expansion from the heating process. The resulting dried mixture was ground into powder and calcinated at 673 K for 5 hours under a reducing atmosphere ( $\text{Ar} : \text{H}_2 = 90 : 10$  vol%), followed by 1023 K for 12 hours under the same atmosphere when the green powder of  $\text{Na}_3\text{V}_2(\text{PO}_4)_3$  is obtained.

*Powder X-Ray Diffraction:* Patterns of Powder X-Ray diffraction (PXRD) of the relevant NZSP materials were measured at  $\sim 25^\circ\text{C}$  ( $\sim 298$  K) using a Bruker D8 Advance diffractometer with a copper source ( $K_{\alpha 1} = 1.54056 \text{ \AA}$  and  $K_{\alpha 2} = 1.54439 \text{ \AA}$ ), and a step size of  $0.021^\circ$ .

For variable temperature XRD measurement, XRD of the NZSP material was carried out over a temperature range of 303 K to 573 K, with a heating step size of 10 K increment for each succeeding diffraction pattern. A temperature ramping of 10 K per minute to the next temperature, followed by a holding time of 15 minutes was done according to the set program before each diffraction pattern was taken. The diffraction pattern was obtained using a PANalytical X'Pert Pro Diffractometer equipped with an Anton Paar HTK 1200 high-temperature camera, with a copper source ( $K_{\alpha 1} = 1.54056 \text{ \AA}$  and  $K_{\alpha 2} = 1.54439 \text{ \AA}$ ) and a step size of  $0.021^\circ$ .

*Synchrotron Powder X-ray Diffraction:* Synchrotron PXRD measurements of the L15 NZSP sample were performed on the MSPD beamline of the ALBA synchrotron in Spain<sup>2</sup> using a Debye–Scherrer geometry ( $\lambda = 0.4437 \text{ \AA}$ ). All Rietveld refinements for all diffraction patterns of both synchrotron and laboratory PXRD experiments were performed using FullProf<sup>3</sup> software.

*Thermogravimetric Analysis measurements:* Thermogravimetric analysis (TGA) of  $\text{ZrO}(\text{NO}_3)_2 \cdot x\text{H}_2\text{O}$  was done using TA Instruments Q50 Thermogravimetric Analyzer to detect the amount of Zr in the precursor to be put into the synthesis, as well as the water content. The measurement was done in a nitrogen ( $\text{N}_2$ ) atmosphere, from 298 K to 1223 K with a heating step of 5 K per minute in an alumina crucible. Approximately 30 mg of  $\text{ZrO}(\text{NO}_3)_2 \cdot x\text{H}_2\text{O}$  precursor was used for the TGA.

*Differential Scanning Calorimetry:* Differential scanning calorimetry (DSC) of the L15 NZSP sample was done using the NETZSCH DSC 204 F1 calorimeter. Approximately 11.8 mg of L15 was used, measured in a standard Aluminium (Al) crucible, with a heating/cooling range of 263 K to 523 K, with a heating/cooling ramp of 10 K/min.

*Inductive Coupled Plasma Spectroscopy of NZSP:* Elemental analysis was performed with Inductive Coupled Plasma Optical Emission Spectroscopy (ICP-OES) through a Perkin Elmer Avio 500 ICP Spectrometer. Approximately 20 mg of the sintered NZSP sample was ground to a fine powder and digested in a mixture of  $\text{HNO}_3$ ,  $\text{HCl}$ , and  $\text{HF}$  (with a 1 : 3 : 1 ratio) on a hotplate for 2 hours. Then, the mixture was topped up the mixture with deionized water. A clear solution was observed before ICP-OES analysis.

*Raman spectroscopy:* The experimental spectra of the synthesized NZSP samples and other compounds of interest (see main text) were obtained using a 514 nm Argon laser from LabRam HR Evolution and a Raman spectrometer from Horiba Scientific. Spectra were acquired from 100 cm<sup>-1</sup> to 2000 cm<sup>-1</sup>.

*Fingerprinting Raman Spectra via Density Functional Theory:* Representative Na-vacancies and P/Si ordering of Na<sub>3</sub>Zr<sub>2</sub>Si<sub>2</sub>PO<sub>12</sub> (N3.0ZSP) were generated from the predicted phase diagram of Ref. 23. The simulated Raman spectra of Na<sub>3</sub>Zr<sub>2</sub>Si<sub>2</sub>PO<sub>12</sub> (N3.0ZSP), *m*-ZrO<sub>2</sub>, Na<sub>2</sub>ZrSi<sub>2</sub>O<sub>7</sub>, and Na<sub>3</sub>PO<sub>4</sub> were obtained using density functional theory as implemented in the CRYSTAL17 code<sup>4</sup>. In CRYSTAL17, the crystalline wavefunctions were expanded using a linear combination of atomic orbitals described by all-electrons Gaussian basis set: for Na<sup>5</sup> a 8-511G, for Si a 88-31-G(\*)<sup>6</sup>, and for P a 85-21-G(\*), and for O a 8-411G(\*), and reported in **Table S11** of the Supplementary Information. Zr atoms were described using an effective core potential by Hay and Wadt<sup>7</sup> excluding the semicore 4s and 4p states, whereas the valence electrons were treated with a 311G31d basis set<sup>8</sup>. In these DFT simulations, the unknown exchange-correlation functional was approximated by the PBE0 hybrid functional proposed by Adamo and Barone<sup>9</sup>. PBE0 includes 25% of the exact Hartree Fock (HF) exchange<sup>10</sup>. The DFT total energies were converged using a homogenous *k*-point grid of 7x7x7 (SHRINK: 7 7). With these settings, the total energies were considered to converge within 10<sup>-11</sup> eV/cell. Within these settings stated above, all structures were fully relaxed (coordinates, shape, volume, and lattice constants). The prediction of the Raman intensities was achieved using the coupled perturbed Kohn–Sham theory, enabling the computation of the third-order derivatives of the DFT total energy with respect to the applied directions of the electric field<sup>10-12</sup>.

*Scanning Electron Microscopy and Energy Dispersive X-Ray Spectroscopy:* The microstructures of the sintered pellets used for the electrochemical impedance measurements were analyzed using the secondary electron mode implemented in a Supra40 (Zeiss) scanning electron microscope (SEM). The energy dispersive X-Ray spectroscopy (EDS) was performed using the Oxford Ultima Max EDS. The incident electrons of the SEM and EDS measurements were carried out using a 10 kV accelerating voltage. Samples were handled in air. The detection of grains from the micrographs of the cross-section of the pellet was through a methodology developed in Ref. 32 in the main text.

*Electrochemical Impedance Spectroscopy measurements:* Sintered pellets were gold-sputtered (~75 nm) with a coater (Bal-Tec SCD 050 Sputter Coater). A vacuum / Ar charge was repeated three times before sputtering. A beam current of 20 mA was applied, and the sputtering lasted ~120 s for each side of the pellet. Carbon paper was then added to each side of the pellet to facilitate good electrical contact with the current collectors for the impedance measurements. For the low-temperature measurements (173 K to 253 K), we employed a cell immersed in a Janis STVP-200-Sol Cryostat connected to a Solartron 1260 A/Solartron 1296 dielectric interface. For moderate-temperature measurements (273 K to 413 K), a CESH cell holder in the ITS instrument setup from Bio-Logic was used. The CESH cell was loaded into the ITS instrument. For high temperature (433 K to 573 K) measurements, a cell holder from Bio-Logic Instruments HTF-1100 setup was used as the sample holder cell. The impedance measurements were performed with a Bio-Logic MTZ-35 Impedance analyzer on a two-wire setup connected to either of the sample holders. Sample loading took place in open air and at

room temperature. Impedance spectra were sampled in a frequency range from 10 MHz to 1 Hz (20 points per decade of frequency), with an alternating voltage amplitude of  $\pm 20$  mV.

The formula for calculating the total ionic conductivity is as follows:

$$\sigma_{total} = \frac{l}{R_{total}A}$$

where  $\sigma_{total}$  is the total ionic conductivity in  $S\ cm^{-1}$ ,  $l$  is the thickness of the sample in cm,  $R_{total}$  is the total resistance experienced by the pellet in Ohms, and  $A$  is the surface area in contact with the current collector, in  $cm^2$ .

**Battery assembly and measurements:** The NVP | NZSP-L0 | NVP and NVP | NZSP-L15 | NVP symmetric all-solid-state batteries are assembled in a 10 mm carbon die and sintered via Spark Plasma Sintering (SPS) at 1173 K, 8 kN, 15 minutes holding time. The cathode part contains 20 mg NVP, 48 mg NZSP (L0/L15), and 12 mg C-45 (Sigma-Aldrich). The mass of the separator layer is 60 mg. The anode part contains 40 mg NVP, 96 mg NZSP (L0/L15), and 24 mg C-45. The obtained symmetric cell was placed inside a high-temperature cell (described in Figure S18) and cycled at high temperatures in a tubular furnace.

## S2 Thermogravimetric Analysis

**Figure S1:** Thermogravimetric analysis of  $\text{ZrO}(\text{NO}_3)_2 \cdot x\text{H}_2\text{O}$  to determine the amount of Zr available in the precursor, as well as its water content. The heating rate is 5 K per minute, in nitrogen ( $\text{N}_2$ ) atmosphere, from 298 K to 1223 K. Approximately 30 mg was used for the TGA.

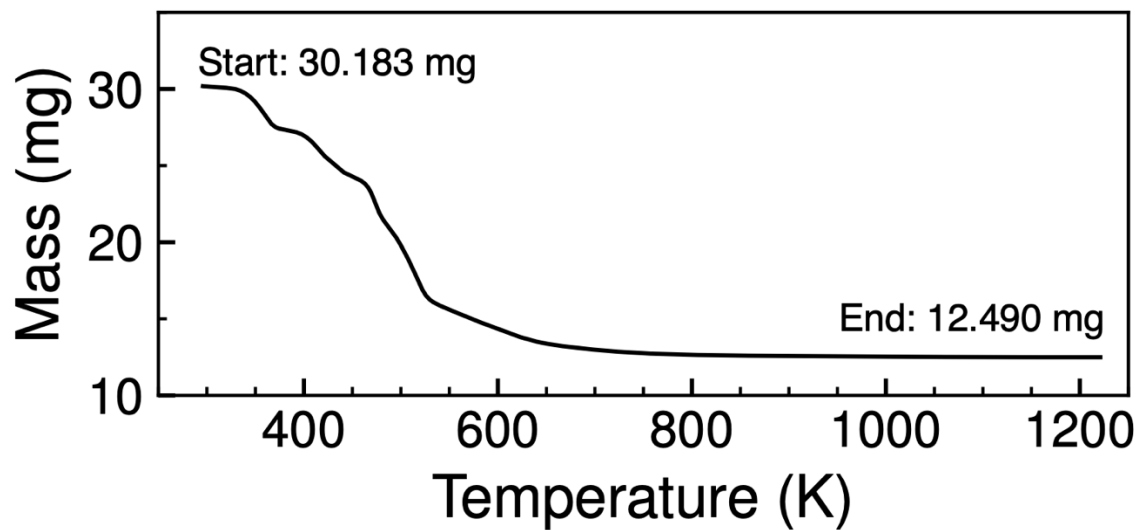

### S3 Elemental Analysis

**Table S2:** Elemental analysis with ICP-OES of the L15 sample. ~20 mg of sintered L15 sample was grounded up to a fine powder, and digested on a mixture of HNO<sub>3</sub>, HCl, and HF in a ratio of 1 : 3 : 1 on a hotplate for 2 hours. The mixture was then topped up with deionized water. A clear solution was observed prior to analysis. The ratios are normalized to Si + P = 3.000.

|       | Na    | Zr    | Si    | P     |
|-------|-------|-------|-------|-------|
| %w/w  | 15.35 | 28.69 | 12.46 | 3.33  |
| Ratio | 3.634 | 1.711 | 2.414 | 0.586 |

**Table S3:** Weight percentages of the phases after Rietveld refinement with the FullProf software. The phases used to index the peaks were N3.4ZSP (*C2/c*), *m*-ZrO<sub>2</sub> (*P2/c*), Na<sub>2</sub>ZrSi<sub>2</sub>O<sub>7</sub> (*P1*), and Na<sub>3</sub>PO<sub>4</sub> (*P4<sub>2</sub>1c*).

| Sample | N3.4ZSP | <i>m</i> -ZrO <sub>2</sub> | Na <sub>2</sub> ZrSi <sub>2</sub> O <sub>7</sub> | Na <sub>3</sub> PO <sub>4</sub> |
|--------|---------|----------------------------|--------------------------------------------------|---------------------------------|
| L0     | 92.07   | 7.93                       | –                                                | –                               |
| L5     | 96.28   | 3.72                       | –                                                | –                               |
| L10    | 97.35   | 2.65                       | –                                                | –                               |
| L15    | 100     | –                          | –                                                | –                               |
| L20    | 99.16   | –                          | –                                                | 0.84                            |
| L25    | 94.50   | –                          | 4.67                                             | 0.83                            |

## S4 Rietveld Refinement of Synchrotron Powder X-Ray Diffraction

**Table S4:** Atomic coordinates,  $U_{iso}$ , and Wyckoff number of the refined L15 cell derived from the Rietveld refinement of the synchrotron PXRD pattern reported in Figure 1c. FullProf software performed the Rietveld refinement to obtain these coordinates and parameters.

| Species | Wyckoff | x       | y       | z       | $U_{iso}$ | Occ. |
|---------|---------|---------|---------|---------|-----------|------|
| Zr      | 8f      | 0.10120 | 0.25120 | 0.05680 | 0.00380   | 1.0  |
| P1      | 4e      | 0.00000 | 0.03900 | 0.25000 | 0.00070   | 0.2  |
| P2      | 8f      | 0.35950 | 0.10700 | 0.26200 | 0.00070   | 0.2  |
| Si1     | 4e      | 0.00000 | 0.03900 | 0.25000 | 0.00070   | 0.8  |
| Si2     | 8f      | 0.35950 | 0.10700 | 0.26200 | 0.00070   | 0.8  |
| O1      | 8f      | 0.14800 | 0.42900 | 0.22800 | 0.00000   | 1.0  |
| O2      | 8f      | 0.43400 | 0.45300 | 0.08400 | 0.00000   | 1.0  |
| O3      | 8f      | 0.25300 | 0.18600 | 0.21500 | 0.00000   | 1.0  |
| O4      | 8f      | 0.37300 | 0.13600 | 0.10300 | 0.00000   | 1.0  |
| O5      | 8f      | 0.45000 | 0.17600 | 0.43600 | 0.00000   | 1.0  |
| O6      | 8f      | 0.07400 | 0.14400 | 0.23600 | 0.00000   | 1.0  |
| Na(1)   | 4d      | 0.25000 | 0.25000 | 0.50000 | 0.28476   | 1.0  |
| Na(2)   | 4e      | 0.50000 | 0.89400 | 0.25000 | 0.00000   | 1.0  |
| Na(3)   | 8f      | 0.83200 | 0.08500 | 0.80300 | 0.08218   | 0.7  |

**Figure S5:** PXRD patterns (from bench XRD) of the L15 NaSICON sample in the temperature range from 303 K to 573 K, and a temperature step of 10 K. Measurement was conducted using a PANalytical X'Pert Pro Diffractometer equipped with an Anton Paar HTK 1200 high-temperature camera, with a copper source ( $K_{\alpha 1} = 1.54056 \text{ \AA}$  and  $K_{\alpha 2} = 1.54439 \text{ \AA}$ ) and a step size of  $0.021^\circ$ . (a) PXRD patterns of the L15 NaSICON sample were recorded from 303 K to 573 K, with a temperature step of 10 K. Peak evolution of NaSICON peak with respect to temperature at  $2\theta$  angles between  $18.6 - 19.6^\circ$  (b),  $22 - 23^\circ$  (c), and  $26.6 - 27.8^\circ$  (d).

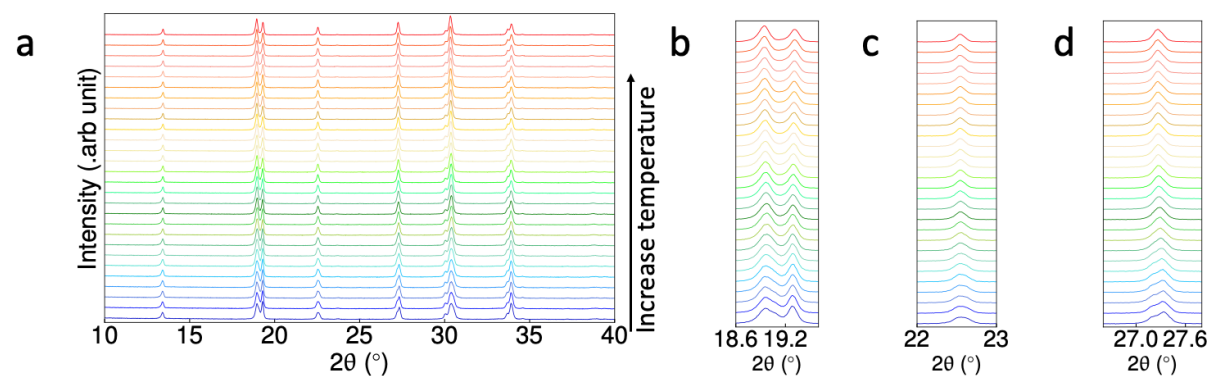



## S5 Differential Scanning Calorimetry

**Figure S6:** DSC measurements of the L15 NaSiCON sample. Approximately 11.8 mg of the grounded sample was used to measure the DSC. The measurements were taken from 243 K to 573 K, with a heating/cooling step of 10 K per minute.

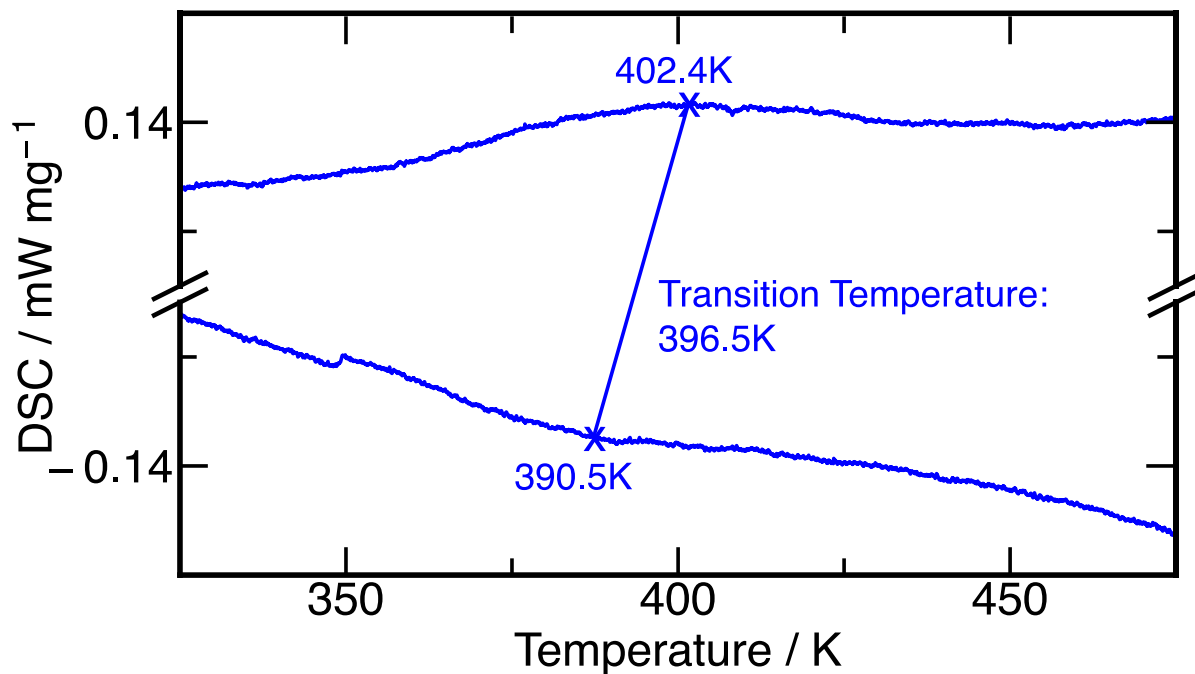

## S6 Raman Assignment via Density Functional Theory

**Table S7:** Assignments of the Raman modes of the NaSICON  $\text{Na}_3\text{Zr}_2\text{Si}_2\text{PO}_{12}$  (N3.0ZSP) obtained from CRYSTAL17 DFT simulations (details of simulations are in Section S1). Note, that there is more than one mode that is assigned to a particular calculated peak. Modes that are indexed in short forms are: translation (t), twisting (or “rotation”) (r), symmetric bending (Sb), asymmetric bending (Ab), symmetric stretching (SS), and asymmetric stretching (AS). As an example, t(Na[011]) is a translation of the Na atom (around its position of equilibrium) in the [011] plane within the NaSICON lattice.

| Mode | Calc. Freq. ( $\text{cm}^{-1}$ ) | Mode Assignment                                                                                                    |
|------|----------------------------------|--------------------------------------------------------------------------------------------------------------------|
| 1    | 0.0000                           | Lattice Translation [001]                                                                                          |
| 2    | 0.0000                           | Lattice Translation [010]                                                                                          |
| 3    | 0.0000                           | Lattice Translation [100]                                                                                          |
| 4    | 42.7225                          | t(Na[011]), t(Na[101]), t(Na[110]), r(ZrO <sub>6</sub> [001]), r(PO <sub>4</sub> [001])                            |
| 5    | 60.0751                          | t(Na[001]), t(Na[010]), t(Na[001]), r(ZrO <sub>6</sub> [001])                                                      |
| 6    | 70.5136                          | t(Na[001]), t(Na[010]), t(Na[001]), r(ZrO <sub>6</sub> [001]), r(PO <sub>4</sub> [001])                            |
| 7    | 72.6970                          | t(Na[001]), t(Na[010]), t(Na[001]), r(ZrO <sub>6</sub> [001]), r(SiO <sub>4</sub> [001]), r(PO <sub>4</sub> [001]) |
| 8    | 85.6394                          | t(Na[001]), t(Na[010]), t(Na[001]), r(ZrO <sub>6</sub> [001])                                                      |
| 9    | 87.3991                          | t(Na[011]), t(Na[101]), t(Na[110]), r(ZrO <sub>6</sub> [001])                                                      |
| 10   | 98.8880                          | t(Na[110]), r(ZrO <sub>6</sub> [001]), r(SiO <sub>4</sub> [001]), r(PO <sub>4</sub> [001])                         |
| 11   | 110.2935                         | t(Na[100]), t(Na[111]), r(ZrO <sub>6</sub> [100]), r(ZrO <sub>6</sub> [110]), r(PO <sub>4</sub> [001])             |
| 12   | 122.8619                         | t(Na[001]), t(Na[111]), r(ZrO <sub>6</sub> [110]), r(SiO <sub>4</sub> [001])                                       |
| 13   | 129.1409                         | t(Na[111]), Sb(ZrO <sub>6</sub> ), r(SiO <sub>4</sub> [001]), r(PO <sub>4</sub> [010])                             |
| 14   | 132.4501                         | t(Na[001]), t(Na[010]), t(Na[001]), Sb(ZrO <sub>6</sub> ), r(PO <sub>4</sub> [100])                                |
| 15   | 134.8279                         | t(Na[100]), t(Na[010]), Sb(ZrO <sub>6</sub> )                                                                      |
| 16   | 135.9098                         | t(Na[100]), t(Na[101]), Sb(ZrO <sub>6</sub> )                                                                      |
| 17   | 140.2840                         | t(Na[101]), t(Na[111]), Ab(ZrO <sub>6</sub> ), r(SiO <sub>4</sub> [010]), r(PO <sub>4</sub> [001])                 |
| 18   | 144.9169                         | t(Na[100]), t(Na[010]), Ab(ZrO <sub>6</sub> ), r(SiO <sub>4</sub> [010]), r(PO <sub>4</sub> [001])                 |
| 19   | 149.8414                         | t(Na[100]), t(Na[010]), Ab(ZrO <sub>6</sub> ), r(SiO <sub>4</sub> [100]), r(PO <sub>4</sub> [001])                 |
| 20   | 150.5651                         | t(Na[101]), t(Na[011]), Ab(ZrO <sub>6</sub> ), r(SiO <sub>4</sub> [100]), r(PO <sub>4</sub> [010])                 |
| 21   | 154.0060                         | t(Na[100]), Ab(ZrO <sub>6</sub> ), r(PO <sub>4</sub> [010])                                                        |
| 22   | 157.8114                         | t(Na[110]), t(Na[010]), Ab(ZrO <sub>6</sub> ), r(PO <sub>4</sub> [010])                                            |
| 23   | 159.9560                         | t(Na[110]), t(Na[010]), Ab(ZrO <sub>6</sub> ), r(PO <sub>4</sub> [010])                                            |
| 24   | 161.3564                         | t(Na[110]), t(Na[010]), Ab(ZrO <sub>6</sub> ), r(PO <sub>4</sub> [010])                                            |
| 25   | 170.0693                         | t(Na[001]), t(Na[010]), t(Na[001]), Sb(ZrO <sub>6</sub> ), r(SiO <sub>4</sub> [010]), r(PO <sub>4</sub> [100])     |
| 26   | 172.2209                         | t(Na[001]), t(Na[010]), t(Na[001]), Sb(ZrO <sub>6</sub> )                                                          |
| 27   | 176.9051                         | t(Na[001]), t(Na[010]), t(Na[001]), Sb(ZrO <sub>6</sub> )                                                          |
| 28   | 181.0690                         | t(Na[001]), t(Na[001]), Sb(ZrO <sub>6</sub> )                                                                      |
| 29   | 182.3849                         | t(Na[001]), t(Na[001]), Ab(ZrO <sub>6</sub> )                                                                      |
| 30   | 187.3536                         | t(Na[010]), t(Na[001]), Ab(ZrO <sub>6</sub> ), r(PO <sub>4</sub> [010])                                            |
| 31   | 189.5056                         | t(Na[100]), t(Na[001]), Sb(ZrO <sub>6</sub> )                                                                      |
| 32   | 190.7157                         | t(Na[001]), t(Na[010]), t(Na[001]), Sb(ZrO <sub>6</sub> )                                                          |

|    |          |                                                                    |
|----|----------|--------------------------------------------------------------------|
| 33 | 196.6156 | Sb(ZrO <sub>6</sub> )                                              |
| 34 | 203.0153 | t(Na[010]), t(Na[001]), Sb(ZrO <sub>6</sub> )                      |
| 35 | 207.2322 | t(Na[110]), t(Na[101]), Ab(ZrO <sub>6</sub> )                      |
| 36 | 214.5550 | t(Na[100]), t(Na[101]), Sb(ZrO <sub>6</sub> )                      |
| 37 | 227.5714 | t(Na[100]), t(Na[101]), Sb(ZrO <sub>6</sub> )                      |
| 38 | 232.8536 | t(Na[110]), t(Na[101]), Sb(ZrO <sub>6</sub> )                      |
| 39 | 236.2719 | t(Na[110]), t(Na[101]), Sb(ZrO <sub>6</sub> )                      |
| 40 | 239.1998 | t(Na[110]), t(Na[101]), Sb(ZrO <sub>6</sub> )                      |
| 41 | 241.3894 | t(Na[110]), t(Na[011]), Sb(ZrO <sub>6</sub> )                      |
| 42 | 242.6034 | t(Na[110]), t(Na[011]), Sb(ZrO <sub>6</sub> )                      |
| 43 | 245.7663 | t(Na[001]), t(Na[010]), Ab(ZrO <sub>6</sub> )                      |
| 44 | 247.9586 | t(Na[010]), t(Na[001]), Sb(ZrO <sub>6</sub> )                      |
| 45 | 252.1639 | t(Na[101]), t(Na[111]), Sb(ZrO <sub>6</sub> )                      |
| 46 | 265.3784 | t(Na[101]), t(Na[111]), Sb(ZrO <sub>6</sub> )                      |
| 47 | 266.3128 | t(Na[101]), t(Na[111]), Sb(ZrO <sub>6</sub> )                      |
| 48 | 272.2786 | t(Na[101]), t(Na[111]), Sb(ZrO <sub>6</sub> )                      |
| 49 | 274.7554 | t(Na[101]), t(Na[111]), Sb(ZrO <sub>6</sub> )                      |
| 50 | 278.3871 | t(Na[101]), t(Na[111]), Sb(ZrO <sub>6</sub> )                      |
| 51 | 279.3991 | Sb(ZrO <sub>6</sub> )                                              |
| 52 | 281.9196 | t(Na[101]), t(Na[110]), Ab(ZrO <sub>6</sub> )                      |
| 53 | 286.1608 | t(Na[101]), t(Na[110]), Ab(ZrO <sub>6</sub> )                      |
| 54 | 291.6582 | t(Na[101]), t(Na[110]), Ab(ZrO <sub>6</sub> )                      |
| 55 | 293.8430 | Ab(ZrO <sub>6</sub> )                                              |
| 56 | 295.3704 | SS(ZrO <sub>6</sub> )                                              |
| 57 | 311.4400 | AS(ZrO <sub>6</sub> )                                              |
| 58 | 311.8728 | AS(ZrO <sub>6</sub> )                                              |
| 59 | 315.4369 | SS(ZrO <sub>6</sub> )                                              |
| 60 | 323.9967 | AS(ZrO <sub>6</sub> )                                              |
| 61 | 326.9914 | AS(ZrO <sub>6</sub> )                                              |
| 62 | 329.1549 | SS(ZrO <sub>6</sub> )                                              |
| 63 | 339.3699 | AS(ZrO <sub>6</sub> )                                              |
| 64 | 340.7982 | AS(ZrO <sub>6</sub> )                                              |
| 65 | 353.1492 | AS(ZrO <sub>6</sub> )                                              |
| 66 | 357.7389 | AS(ZrO <sub>6</sub> )                                              |
| 67 | 372.1270 | AS(ZrO <sub>6</sub> )                                              |
| 68 | 384.5090 | AS(ZrO <sub>6</sub> ), Sb(PO <sub>4</sub> )                        |
| 69 | 403.8728 | AS(ZrO <sub>6</sub> ), Sb(SiO <sub>4</sub> ), Sb(PO <sub>4</sub> ) |
| 70 | 409.3494 | AS(ZrO <sub>6</sub> ), Sb(SiO <sub>4</sub> ), Sb(PO <sub>4</sub> ) |
| 71 | 409.6638 | AS(ZrO <sub>6</sub> ), Sb(SiO <sub>4</sub> ), Sb(PO <sub>4</sub> ) |
| 72 | 415.4734 | AS(ZrO <sub>6</sub> ), Sb(SiO <sub>4</sub> ), Sb(PO <sub>4</sub> ) |
| 73 | 423.5747 | AS(ZrO <sub>6</sub> ), Sb(SiO <sub>4</sub> ), Sb(PO <sub>4</sub> ) |
| 74 | 430.7279 | SS(ZrO <sub>6</sub> ), Sb(SiO <sub>4</sub> ), Sb(PO <sub>4</sub> ) |

|     |           |                                                                    |
|-----|-----------|--------------------------------------------------------------------|
| 75  | 436.9988  | SS(ZrO <sub>6</sub> ), Sb(SiO <sub>4</sub> ), Sb(PO <sub>4</sub> ) |
| 76  | 441.1847  | SS(ZrO <sub>6</sub> ), Sb(SiO <sub>4</sub> ), Sb(PO <sub>4</sub> ) |
| 77  | 455.0415  | SS(ZrO <sub>6</sub> ), Sb(SiO <sub>4</sub> ), Sb(PO <sub>4</sub> ) |
| 78  | 459.9126  | SS(ZrO <sub>6</sub> ), Sb(SiO <sub>4</sub> ), Sb(PO <sub>4</sub> ) |
| 79  | 508.4252  | SS(ZrO <sub>6</sub> ), Sb(SiO <sub>4</sub> ), Sb(PO <sub>4</sub> ) |
| 80  | 510.6596  | SS(ZrO <sub>6</sub> ), Sb(SiO <sub>4</sub> ), Sb(PO <sub>4</sub> ) |
| 81  | 534.9068  | SS(ZrO <sub>6</sub> ), Sb(SiO <sub>4</sub> ), Sb(PO <sub>4</sub> ) |
| 82  | 549.9947  | AS(ZrO <sub>6</sub> ), Sb(SiO <sub>4</sub> ), Sb(PO <sub>4</sub> ) |
| 83  | 552.1295  | AS(ZrO <sub>6</sub> ), Ab(SiO <sub>4</sub> ), Ab(PO <sub>4</sub> ) |
| 84  | 554.3278  | AS(ZrO <sub>6</sub> ), Ab(SiO <sub>4</sub> ), Ab(PO <sub>4</sub> ) |
| 85  | 557.8641  | AS(ZrO <sub>6</sub> ), Ab(SiO <sub>4</sub> ), Ab(PO <sub>4</sub> ) |
| 86  | 568.3046  | AS(ZrO <sub>6</sub> ), Ab(SiO <sub>4</sub> ), Ab(PO <sub>4</sub> ) |
| 87  | 572.1661  | AS(ZrO <sub>6</sub> ), Ab(SiO <sub>4</sub> ), Ab(PO <sub>4</sub> ) |
| 88  | 590.2987  | AS(ZrO <sub>6</sub> ), Ab(SiO <sub>4</sub> ), Ab(PO <sub>4</sub> ) |
| 89  | 601.6567  | SS(ZrO <sub>6</sub> ), Ab(SiO <sub>4</sub> ), Sb(PO <sub>4</sub> ) |
| 90  | 604.7750  | AS(ZrO <sub>6</sub> ), Ab(SiO <sub>4</sub> ), Ab(PO <sub>4</sub> ) |
| 91  | 610.7360  | AS(ZrO <sub>6</sub> ), Ab(SiO <sub>4</sub> ), Ab(PO <sub>4</sub> ) |
| 92  | 627.8206  | AS(ZrO <sub>6</sub> ), Ab(SiO <sub>4</sub> ), Ab(PO <sub>4</sub> ) |
| 93  | 632.0229  | AS(ZrO <sub>6</sub> ), Ab(SiO <sub>4</sub> ), Ab(PO <sub>4</sub> ) |
| 94  | 657.1049  | AS(ZrO <sub>6</sub> ), Ab(SiO <sub>4</sub> ), Ab(PO <sub>4</sub> ) |
| 95  | 658.4068  | AS(ZrO <sub>6</sub> ), Ab(SiO <sub>4</sub> ), Ab(PO <sub>4</sub> ) |
| 96  | 662.2466  | AS(ZrO <sub>6</sub> ), Ab(SiO <sub>4</sub> ), Sb(PO <sub>4</sub> ) |
| 97  | 901.9627  | AS(SiO <sub>4</sub> )                                              |
| 98  | 906.6899  | AS(SiO <sub>4</sub> )                                              |
| 99  | 907.4195  | AS(SiO <sub>4</sub> )                                              |
| 100 | 923.0757  | AS(SiO <sub>4</sub> )                                              |
| 101 | 925.0294  | AS(SiO <sub>4</sub> )                                              |
| 102 | 925.5833  | AS(SiO <sub>4</sub> )                                              |
| 103 | 934.8516  | AS(SiO <sub>4</sub> )                                              |
| 104 | 935.4150  | AS(SiO <sub>4</sub> )                                              |
| 105 | 951.7611  | AS(SiO <sub>4</sub> )                                              |
| 106 | 966.4182  | AS(SiO <sub>4</sub> ), AS(PO <sub>4</sub> )                        |
| 107 | 975.4268  | SS(SiO <sub>4</sub> ), AS(PO <sub>4</sub> )                        |
| 108 | 982.3436  | AS(SiO <sub>4</sub> ), AS(PO <sub>4</sub> )                        |
| 109 | 988.9439  | AS(SiO <sub>4</sub> ), AS(PO <sub>4</sub> )                        |
| 110 | 994.3543  | SS(SiO <sub>4</sub> ), SS(PO <sub>4</sub> )                        |
| 111 | 1001.4263 | AS(SiO <sub>4</sub> ), AS(PO <sub>4</sub> )                        |
| 112 | 1005.2611 | AS(SiO <sub>4</sub> ), AS(PO <sub>4</sub> )                        |
| 113 | 1022.2902 | SS(PO <sub>4</sub> )                                               |
| 114 | 1026.3351 | SS(PO <sub>4</sub> )                                               |
| 115 | 1037.9514 | SS(PO <sub>4</sub> )                                               |
| 116 | 1052.2416 | AS(PO <sub>4</sub> )                                               |

|     |           |                      |
|-----|-----------|----------------------|
| 117 | 1064.9544 | AS(PO <sub>4</sub> ) |
| 118 | 1146.1995 | AS(PO <sub>4</sub> ) |
| 119 | 1156.6738 | AS(PO <sub>4</sub> ) |
| 120 | 1157.7911 | AS(PO <sub>4</sub> ) |

**Table S8:** Assignments of the Raman modes of the impurity *m*-ZrO<sub>2</sub>. The interpretation of the modes is identical to what was explained in the description of **Table S7**.

| Mode | Calc. Freq. (cm <sup>-1</sup> ) | Mode Assignment                              |
|------|---------------------------------|----------------------------------------------|
| 1    | 115.7909                        | r(ZrO <sub>2</sub> [110])                    |
| 2    | 188.3603                        | Sb(ZrO <sub>2</sub> )                        |
| 3    | 188.3969                        | Sb(ZrO <sub>2</sub> )                        |
| 4    | 202.9186                        | Ab(ZrO <sub>2</sub> )                        |
| 5    | 233.0552                        | Ab(ZrO <sub>2</sub> )                        |
| 6    | 308.7267                        | Sb(ZrO <sub>2</sub> ), Ab(ZrO <sub>2</sub> ) |
| 7    | 338.2778                        | Ab(ZrO <sub>2</sub> )                        |
| 8    | 345.2735                        | Ab(ZrO <sub>2</sub> )                        |
| 9    | 356.0555                        | Sb(ZrO <sub>2</sub> )                        |
| 10   | 384.4960                        | Sb(ZrO <sub>2</sub> )                        |
| 11   | 385.2649                        | Ab(ZrO <sub>2</sub> )                        |
| 12   | 478.5208                        | Sb(ZrO <sub>2</sub> )                        |
| 13   | 509.3735                        | Ab(ZrO <sub>2</sub> )                        |
| 14   | 545.4148                        | Sb(ZrO <sub>2</sub> )                        |
| 15   | 558.7444                        | Sb(ZrO <sub>2</sub> )                        |
| 16   | 618.7032                        | Ab(ZrO <sub>2</sub> )                        |
| 17   | 646.5437                        | Ab(ZrO <sub>2</sub> )                        |
| 18   | 770.7043                        | SS(ZrO <sub>2</sub> )                        |

**Table S9:** Assignments of the Raman modes of the impurity  $\text{Na}_2\text{ZrSi}_2\text{O}_7$ . The interpretation of the modes is identical to what was explained in the description of **Table S7**.

| Mode | Calc. Freq. ( $\text{cm}^{-1}$ ) | Mode Assignment                                                                  |
|------|----------------------------------|----------------------------------------------------------------------------------|
| 1    | 70.8968                          | t(Na[101]), r( $\text{ZrO}_6$ [110]), r( $\text{SiO}_4$ [011])                   |
| 2    | 101.1377                         | t(Na[110]), t(Na[001]), Sb( $\text{ZrO}_6$ ), r( $\text{SiO}_4$ [111])           |
| 3    | 118.1890                         | t(Na[011]), t(Na[111]), r( $\text{ZrO}_6$ [010]), r( $\text{SiO}_4$ [101])       |
| 4    | 120.2545                         | t(Na[100]), t(Na[110]), r( $\text{ZrO}_6$ [010]), r( $\text{SiO}_4$ [010])       |
| 5    | 129.2724                         | t(Na[111]), t(Na[110]), Ab( $\text{ZrO}_6$ ), r( $\text{SiO}_4$ [101])           |
| 6    | 132.2174                         | t(Na[100]), Ab( $\text{ZrO}_6$ ), r( $\text{SiO}_4$ [001])                       |
| 7    | 158.1131                         | t(Na[100]), t(Na[011]), Ab( $\text{ZrO}_6$ ), r( $\text{SiO}_4$ [001])           |
| 8    | 160.5500                         | t(Na[100]), t(Na[011]), Ab( $\text{ZrO}_6$ ), r( $\text{SiO}_4$ [011])           |
| 9    | 169.2149                         | t(Na[110]), t(Na[111]), Ab( $\text{ZrO}_6$ ), r( $\text{SiO}_4$ [011])           |
| 10   | 183.3230                         | t(Na[100]), Ab( $\text{ZrO}_6$ ), r( $\text{SiO}_4$ [110])                       |
| 11   | 199.1171                         | t(Na[100]), (Na[110]), Ab( $\text{ZrO}_6$ ), r( $\text{SiO}_4$ [101])            |
| 12   | 221.4612                         | t(Na[001]), Ab( $\text{ZrO}_6$ ), Sb( $\text{ZrO}_6$ ), r( $\text{SiO}_4$ [101]) |
| 13   | 241.6159                         | t(Na[010]), Ab( $\text{ZrO}_6$ ), r( $\text{SiO}_4$ [101])                       |
| 14   | 248.2759                         | t(Na[010]), Ab( $\text{ZrO}_6$ ), r( $\text{SiO}_4$ [101])                       |
| 15   | 258.8266                         | t(Na[010]), Ab( $\text{ZrO}_6$ ), r( $\text{SiO}_4$ [101])                       |
| 16   | 269.5954                         | Ab( $\text{ZrO}_6$ ), r( $\text{SiO}_4$ [101])                                   |
| 17   | 320.0136                         | Sb( $\text{ZrO}_6$ ), r( $\text{SiO}_4$ [110])                                   |
| 18   | 341.1943                         | Ab( $\text{ZrO}_6$ ), r( $\text{SiO}_4$ [111])                                   |
| 19   | 357.4132                         | Ab( $\text{ZrO}_6$ ), Sb( $\text{SiO}_4$ )                                       |
| 20   | 390.1828                         | Sb( $\text{ZrO}_6$ ), Sb( $\text{SiO}_4$ )                                       |
| 21   | 393.4126                         | Sb( $\text{ZrO}_6$ ), Sb( $\text{SiO}_4$ )                                       |
| 22   | 419.2195                         | SS( $\text{ZrO}_6$ ), Sb( $\text{SiO}_4$ )                                       |
| 23   | 439.7868                         | Ab( $\text{ZrO}_6$ ), Sb( $\text{SiO}_4$ )                                       |
| 24   | 503.2211                         | SS( $\text{ZrO}_6$ ), Sb( $\text{SiO}_4$ )                                       |
| 25   | 536.1329                         | Ab( $\text{ZrO}_6$ ), SS( $\text{ZrO}_6$ ), Sb( $\text{SiO}_4$ )                 |
| 26   | 548.8925                         | SS( $\text{ZrO}_6$ ), Sb( $\text{SiO}_4$ )                                       |
| 27   | 607.8885                         | AS( $\text{ZrO}_6$ ), Sb( $\text{SiO}_4$ )                                       |
| 28   | 629.8697                         | AS( $\text{ZrO}_6$ ), Sb( $\text{SiO}_4$ )                                       |
| 29   | 732.9464                         | SS( $\text{SiO}_4$ )                                                             |
| 30   | 869.8617                         | SS( $\text{SiO}_4$ )                                                             |
| 31   | 924.3959                         | AS( $\text{SiO}_4$ )                                                             |
| 32   | 956.0871                         | AS( $\text{SiO}_4$ )                                                             |
| 33   | 958.7309                         | AS( $\text{SiO}_4$ )                                                             |
| 34   | 1005.9236                        | AS( $\text{SiO}_4$ )                                                             |
| 35   | 1011.8602                        | AS( $\text{SiO}_4$ )                                                             |
| 36   | 1049.8196                        | AS( $\text{SiO}_4$ )                                                             |

**Figure S10:** Experimental Raman spectra of  $m\text{-ZrO}_2$  obtained within the range of  $100\text{ cm}^{-1}$  to  $1000\text{ cm}^{-1}$ . The experimental Raman spectrum of  $m\text{-ZrO}_2$  (in green) matches well with DFT calculations (in light blue sticks). DFT calculations are simultaneously used to identify peaks in the NaSICON samples. The other sticks are the N3.0ZSP DFT calculation (magenta) and  $\text{Na}_2\text{ZrSi}_2\text{O}_7$  (maroon), calculated and indexed in Table S7 and S9 respectively.

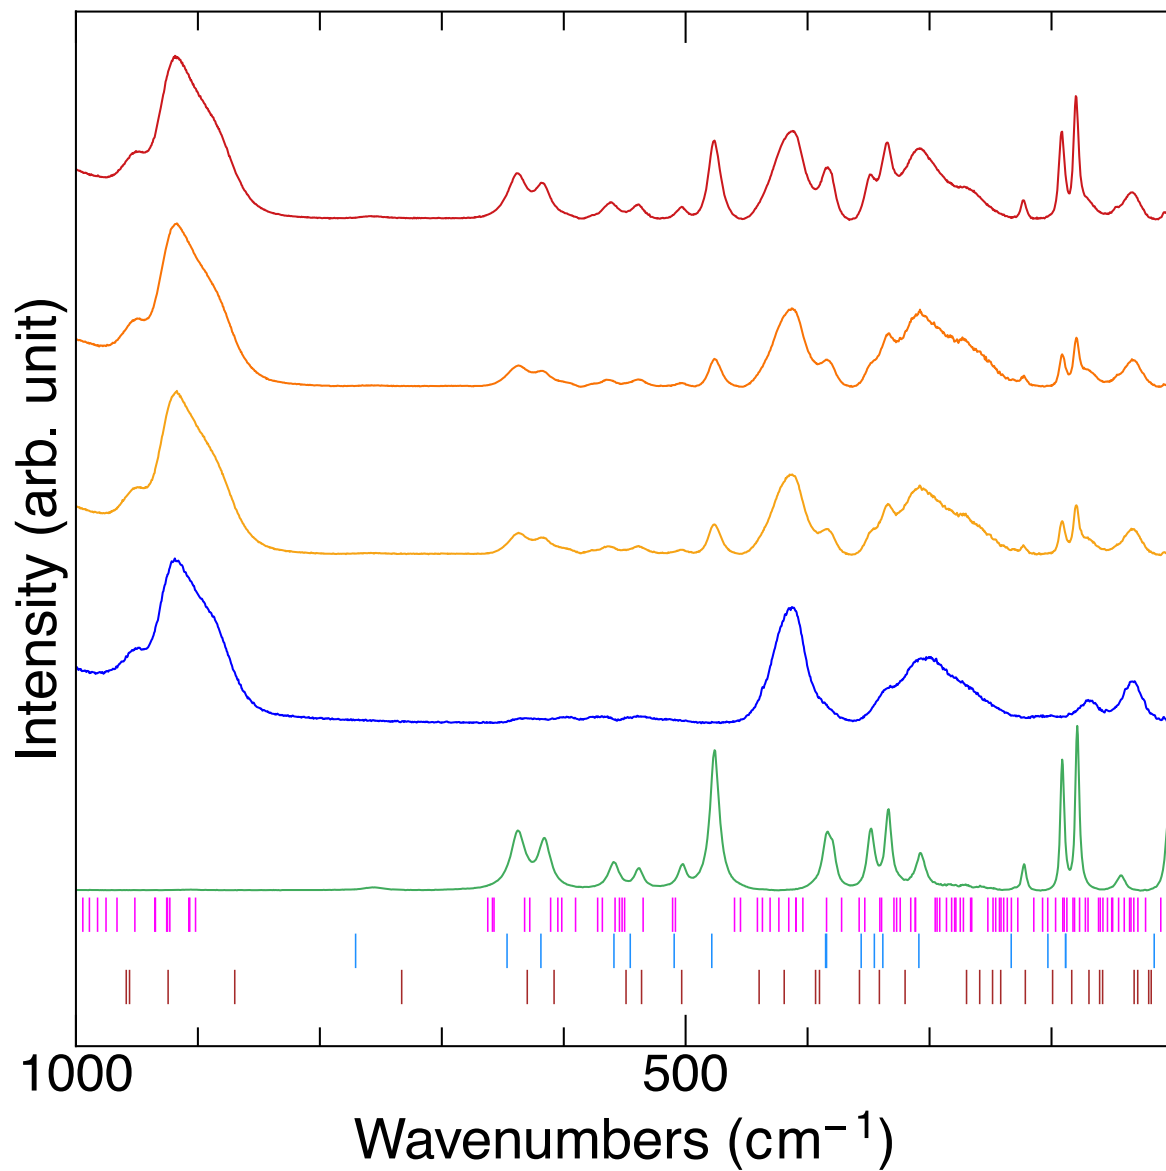



**Table S11:** Basis sets of Na, Zr, Si, P, and O used in the calculation using CRYSTAL17 for the compounds reported in **Tables S7 - S9**.

| Na                              | Zr                            |
|---------------------------------|-------------------------------|
| 11 9                            | 240 11                        |
| 0 0 7 2.0 1.0                   | INPUT                         |
| 26041.1099270 0.00061806342811  | 12. 0 2 4 4 2 0               |
| 3906.12685480 0.00477486044140  | 8.636528 150.242994 0         |
| 888.974549930 0.02447168482900  | 3.717639 18.780036 0          |
| 251.454979610 0.09475539497700  | 7.626728 33.192791 0          |
| 81.6501435120 0.26867496920000  | 7.453207 66.389039 0          |
| 28.9041584010 0.47925475440000  | 3.358389 4.620726 0           |
| 10.6257829320 0.33248591469000  | 3.229738 9.260270 0           |
| 0 0 3 2.0 1.0                   | 5.938086 13.993383 0          |
| 53.7694101790 0.01952773187200  | 5.825544 20.995882 0          |
| 16.3082430250 0.09264801079400  | 2.205019 2.285166 0           |
| 2.37303841250 -0.39938670172000 | 2.206292 3.441260 0           |
| 0 0 2 1.0 1.0                   | 4.800215 -5.239320 0          |
| 0.95730772603 1.64285953910000  | 4.798992 -6.987424 0          |
| 0.40806460959 0.55692596966000  | 0 0 2 2 1.0                   |
| 0 0 1 0.0 1.0                   | 11.0000000000 -0.190755952570 |
| 0.42460191000 1.00000000000000  | 9.5000000000 0.338955887540   |
| 0 0 1 0.0 1.0                   | 0 0 1 2 1.0                   |
| 0.12055549000 1.00000000000000  | 3.91891211000 1.000000000000  |
| 0 2 5 6.0 1.0                   | 0 0 1 0 1.0                   |
| 138.079799890 0.00579518919290  | 1.48625300000 1.000000000000  |
| 32.2327003930 0.04162084625100  | 0 0 1 0 1.0                   |
| 9.98160753600 0.16281916885000  | 0.581428600000 1.000000000000 |
| 3.48220339280 0.36011784647000  | 0 2 4 6 1.0                   |
| 1.22991346200 0.44858979889000  | 8.60663055430 0.040404260236  |
| 0 2 1 0.0 1.0                   | 4.44009799580 -0.211877452010 |
| 0.40094322000 1.00000000000000  | 1.12810269460 0.491642668910  |
| 0 2 1 0.0 1.0                   | 0.54346076310 0.573033706580  |
| 0.12067345000 1.00000000000000  | 0 2 1 0 1.0                   |
| 0 3 1 0.0 1.0                   | 0.49792620000 1.000000000000  |
| 0.30530000000 1.00000000000000  | 0 2 1 0 1.0                   |
|                                 | 0.16451000000 1.000000000000  |
|                                 | 0 3 3 2 1.0                   |
|                                 | 4.55679577950 -0.009619056902 |
|                                 | 1.29049397970 0.205699901550  |
|                                 | 0.51646987222 0.418313818510  |
|                                 | 0 3 1 0 1.0                   |
|                                 | 0.38034710000 1.000000000000  |
|                                 | 0 3 1 0 1.0                   |
|                                 | 0.16106300000 1.000000000000  |
|                                 | 0 4 1 0 1.0                   |
|                                 | 0.34548200000 1.000000000000  |
| <b>Si</b>                       | <b>P</b>                      |
| 14 10                           | 15 10                         |

|               |                   |               |                  |
|---------------|-------------------|---------------|------------------|
| 0 0 7 2.0 1.0 |                   | 0 0 7 2.0 1.0 |                  |
| 44773.358078  | 0.00055914765868  | 52426.999233  | 0.0005520716410  |
| 6717.1992104  | 0.00432060401890  | 7863.2660552  | 0.0042678595308  |
| 1528.8960325  | 0.02218709646000  | 1789.5227333  | 0.0219315291860  |
| 432.54746585  | 0.08648924911600  | 506.27300165  | 0.0856671683730  |
| 140.61505226  | 0.24939889716000  | 164.60698546  | 0.2484068660500  |
| 49.857636724  | 0.46017197366000  | 58.391918722  | 0.4633675397100  |
| 18.434974885  | 0.34250236575000  | 21.643663201  | 0.3535055815600  |
| 0 0 3 2.0 1.0 |                   | 0 0 3 2.0 1.0 |                  |
| 86.533886111  | 0.02130006300700  | 99.013837620  | 0.0218956799580  |
| 26.624606846  | 0.09467613931800  | 30.550439817  | 0.0956504702950  |
| 4.4953057159  | -0.32616264859000 | 5.4537087661  | -0.2945427018600 |
| 0 0 2 2.0 1.0 |                   | 0 0 2 2.0 1.0 |                  |
| 2.1035045710  | 1.39808038500000  | 2.6503362563  | 1.3294381200000  |
| 1.3106094922  | 0.63865786699000  | 1.2726688867  | 0.6610939647300  |
| 0 0 1 0.0 1.0 |                   | 0 0 1 0.0 1.0 |                  |
| 0.5422443800  | 1.00000000000000  | 0.3072409700  | 1.00000000000000 |
| 0 0 1 0.0 1.0 |                   | 0 0 1 0.0 1.0 |                  |
| 0.1460762500  | 1.00000000000000  | 0.1202708300  | 1.00000000000000 |
| 0 2 5 6.0 1.0 |                   | 0 2 5 6.0 1.0 |                  |
| 394.47503628  | 0.00262856939590  | 472.27219248  | 0.0025710623052  |
| 93.137683104  | 0.02055625774900  | 111.58882756  | 0.0202502979990  |
| 29.519608742  | 0.09207026280100  | 35.445936418  | 0.0915807167870  |
| 10.781663791  | 0.25565889739000  | 12.990776875  | 0.2574945401400  |
| 4.1626574778  | 0.42111707185000  | 5.0486221658  | 0.4286289975800  |
| 0 2 1 2.0 1.0 |                   | 0 2 1 3.0 1.0 |                  |
| 1.4499318500  | 1.00000000000000  | 1.8889755200  | 1.00000000000000 |
| 0 2 1 0.0 1.0 |                   | 0 2 1 0.0 1.0 |                  |
| 0.4949286700  | 1.00000000000000  | 0.4424064200  | 1.00000000000000 |
| 0 2 1 0.0 1.0 |                   | 0 2 1 0.0 1.0 |                  |
| 0.1346786100  | 1.00000000000000  | 0.1573225300  | 1.00000000000000 |
| 0 3 1 0.0 1.0 |                   | 0 3 1 0.0 1.0 |                  |
| 0.3074090300  | 1.00000000000000  | 0.5061295000  | 1.00000000000000 |
| <b>O</b>      |                   |               |                  |
| 8 8           |                   |               |                  |
| 0 0 6 2.0 1.0 |                   |               |                  |
| 27032.382631  | 0.00021726302465  |               |                  |
| 4052.3871392  | 0.00168386621990  |               |                  |
| 922.32722710  | 0.00873956162650  |               |                  |
| 261.24070989  | 0.03523996880800  |               |                  |
| 85.354641351  | 0.11153519115000  |               |                  |
| 31.035035245  | 0.25588953961000  |               |                  |
| 0 0 2 2.0 1.0 |                   |               |                  |
| 12.260860728  | 0.39768730901000  |               |                  |
| 4.9987076005  | 0.24627849430000  |               |                  |
| 0 0 1 0.0 1.0 |                   |               |                  |
| 1.0987136000  | 1.00000000000000  |               |                  |
| 0 0 1 0.0 1.0 |                   |               |                  |
| 0.3565870100  | 1.00000000000000  |               |                  |
| 0 2 4 4.0 1.0 |                   |               |                  |
| 63.274954801  | 0.0060685103418   |               |                  |
| 14.627049379  | 0.0419125758240   |               |                  |
| 4.4501223456  | 0.1615384108800   |               |                  |
| 1.5275799647  | 0.3570695131100   |               |                  |
| 0 2 1 0.0 1.0 |                   |               |                  |
| 0.5489735000  | 1.00000000000000  |               |                  |
| 0 2 1 0.0 1.0 |                   |               |                  |
| 0.1858671100  | 1.00000000000000  |               |                  |

|                               |  |
|-------------------------------|--|
| 0 3 1 0.0 1.0                 |  |
| 0.4534621300 1.00000000000000 |  |

## S7 Grain size distribution from SEM imaging

**Figure S12:** Statistical distribution of the cross-section grain size of L15 (b) and L0 (d). The mean average grain area for L15 is around  $0.093 \mu\text{m}^2$ , with a maximum grain area of  $17.18 \mu\text{m}^2$ . The sampled cross section of L0 has an average grain area of  $0.372 \mu\text{m}^2$ , with a maximum grain area of  $39.53 \mu\text{m}^2$ .

**a** L15 Grains

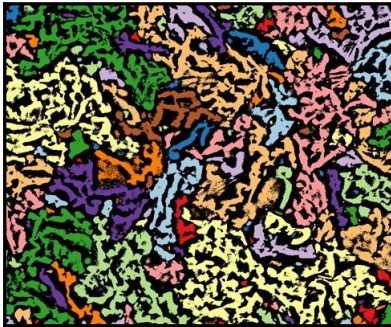

**b**

L15 Area

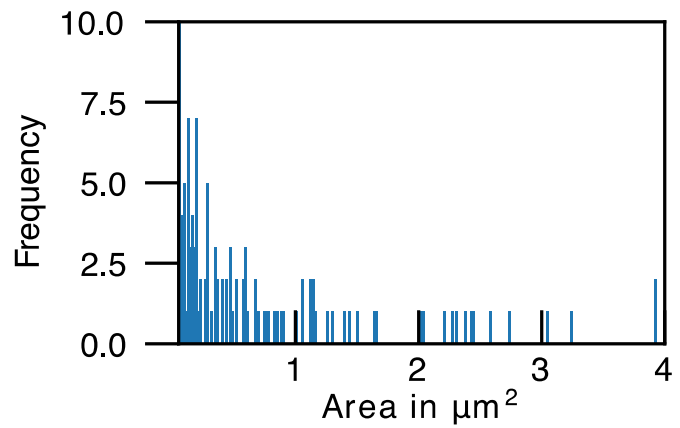

**c** L0 Grains

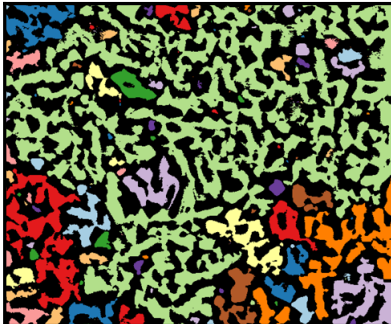

**d**

L0 Area

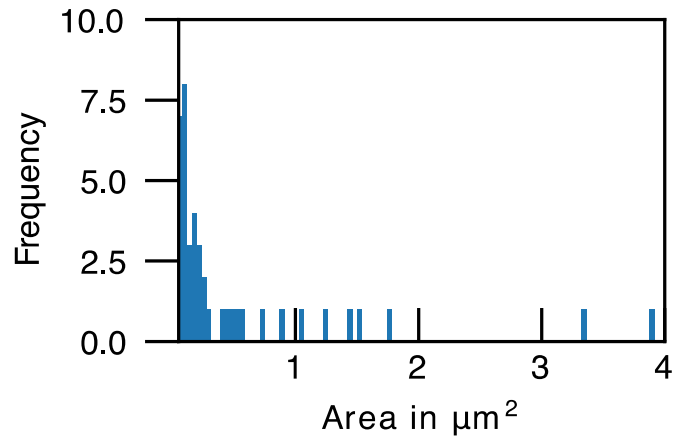

**Figure S13:** SEM images of pre-sintered powders, after calcination and ball milling of samples: a) L0, b) L5, c) L10, and d) L15, respectively. The black background in these micrographs is the carbon tape used as an adhesive for the pre-sintered powders.

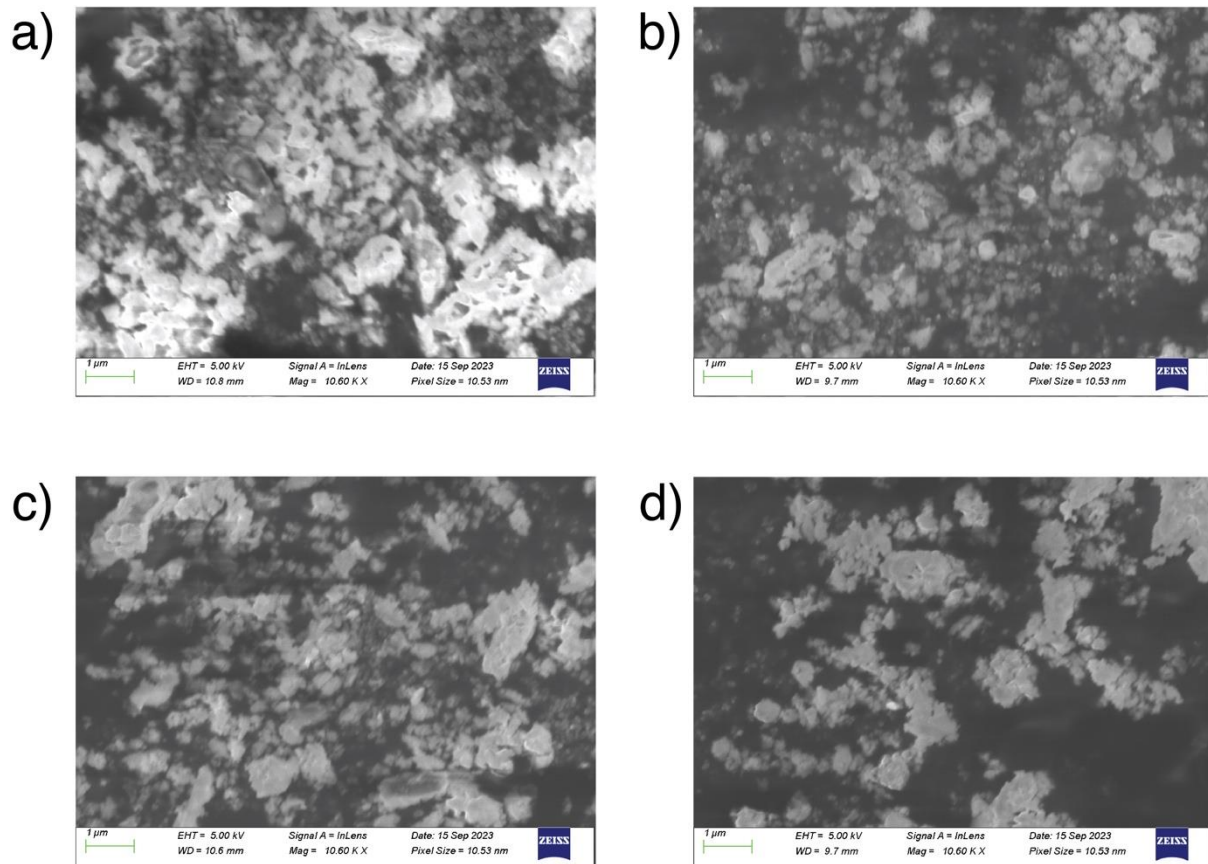

**Table S14:** Maximum and average grain area (in  $\mu\text{m}^2$ ) detected in the SEM micrographs using the method exposed in Ref. 32 of the main text.

| Species | Maximum grain area | Average grain area |
|---------|--------------------|--------------------|
| L0      | 10.647             | 0.0316             |
| L5      | 3.492              | 0.0100             |
| L10     | 3.504              | 0.0136             |
| L15     | 7.250              | 0.0079             |

## S8 Fitting Parameters of Impedance Spectroscopy, electronic conductivity, and symmetric battery performance

**Figure S15:** Comparison of L0 and L15 NaSiCON pellet at low-temperature EIS measurement, at 193 K. (a) shows the overall Nyquist plots containing L0 (dark red) and L15 (blue). The L15 is barely visible, showing the large resistance experienced by the Na-ion during ion transport at 193 K in L0 compared to L15. (b) shows the zoomed-in graph, near the origin of (a), where the bulk resistance of L0 is visible. The L0 pellet has a dimension of 8.15 mm in diameter and 1.90 mm in thickness. The equivalence circuit of L0 is also shown here. All Nyquist plots here are fitted, indicated with their respective dashed line.

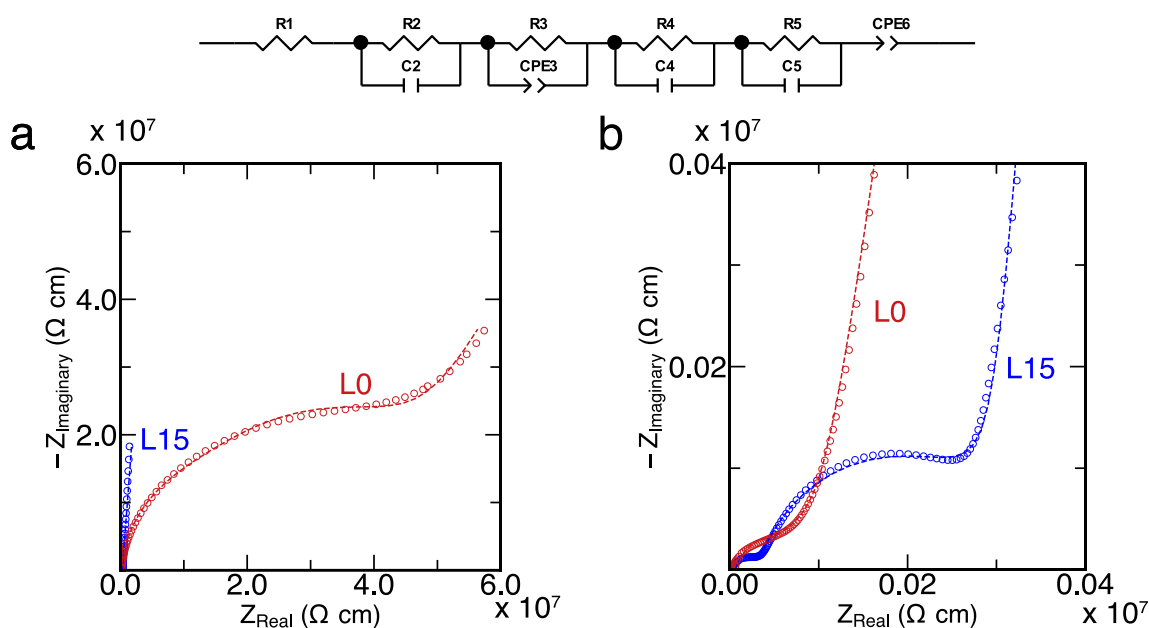

**Figure S16:** Charge/discharge profile between 0 – 3 V of two all-NaSICON solid-state cells with the following configurations: a)  $\text{Na}_3\text{V}_2(\text{PO}_4)_3$  | NZSP-L0 |  $\text{Na}_3\text{V}_2(\text{PO}_4)_3$  and b)  $\text{Na}_3\text{V}_2(\text{PO}_4)_3$  | NZSP-L15 |  $\text{Na}_3\text{V}_2(\text{PO}_4)_3$ , with a charge/discharge rate of C/20 (blue), C/10 (green) and C/5 (yellow). The x-axis represents the specific capacity in  $\text{mAh g}^{-1}$ , while the y-axis denotes the cell voltage of the battery. c), d) and e) shows the polarization of L0 (yellow) and L15 (blue) during the charging/discharge process, from 0 – 3 V. In panels c), d), and e). The x-axis presents the amount of Na per formula unit  $x$  in the active material  $\text{Na}_x\text{V}_2(\text{PO}_4)_3$  during the charge/discharge process.

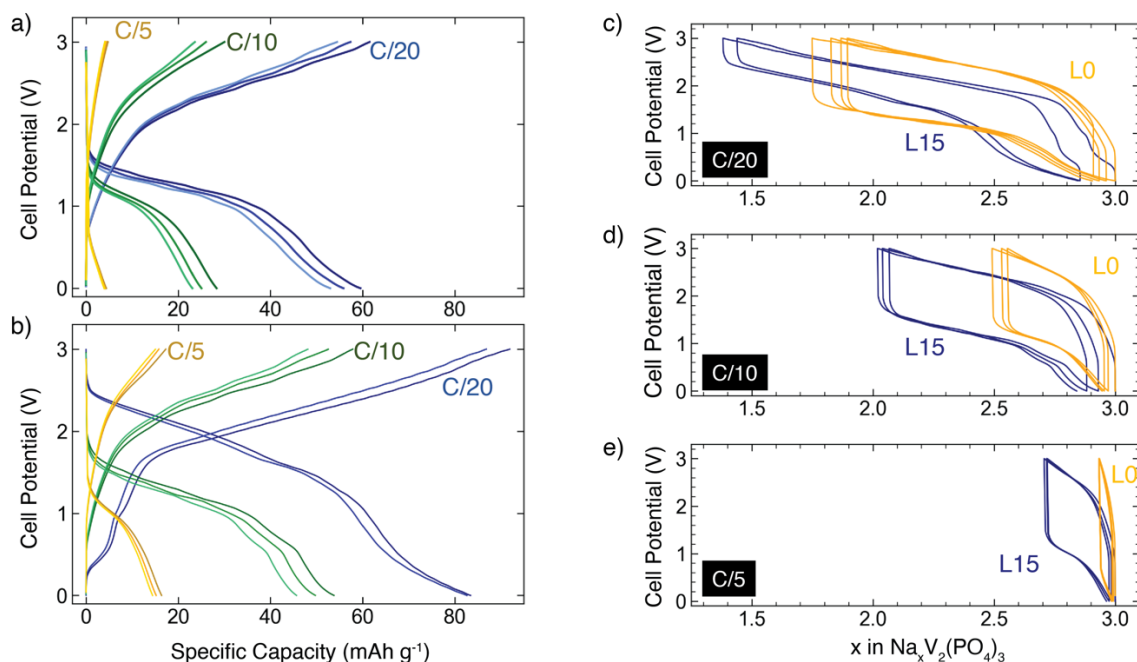

**Table S17:** Gravimetric capacity (in  $\text{mAh g}^{-1}$ ) of the first charge at C/20, C/10, and C/5 for L0 and L15 sample and their corresponding estimated polarization values (in V).

| Rate     | C/20     |              | C/10     |              | C/5      |              |
|----------|----------|--------------|----------|--------------|----------|--------------|
| Sample   | Capacity | Polarization | Capacity | Polarization | Capacity | Polarization |
| NZSP-L0  | 61.49    | 1.31         | 30.01    | 1.50         | 4.70     | 2.22         |
| NZSP-L15 | 91.94    | 0.62         | 57.90    | 1.27         | 17.31    | 1.63         |

**Figure S18:** Optical photographs of the a) L15 pellet with gold sputtered on the surface, b) a close-up image of the NVP | L15 | NVP cell, and c) the electrochemical setup of our NVP | L15 | NVP cell.

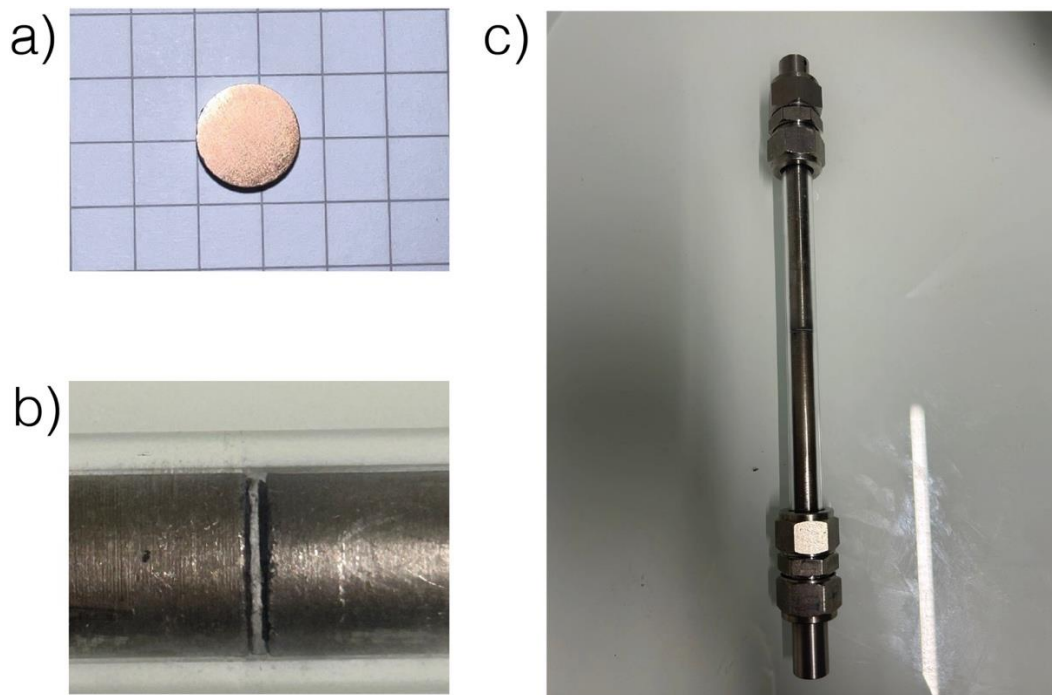

**Table S19:** Fitted parameters of the Nyquist plot of **Figure 4a** in the main text. The various values of the equivalence circuit used to fit the Nyquist plot at 193 K are reported in this table, along with its associated error. R element is a resistor, and CPE is a constant phase element modeling the pseudo-capacitance experienced by the bulk and grain boundary in the Nyquist plot.

| Circuit Element | Fitted value           | Error (%) |
|-----------------|------------------------|-----------|
| R1 ( $\Omega$ ) | 3066                   | 8.20      |
| R2 ( $\Omega$ ) | $1.09 \times 10^4$     | 4.69      |
| CPE2 (F)        | $2.99 \times 10^{-11}$ | 43.31     |
| R3 ( $\Omega$ ) | $1.18 \times 10^5$     | 2.65      |
| CPE3 (F)        | $4.31 \times 10^{-9}$  | 11.85     |
| CPE4 (F)        | $2.08 \times 10^{-8}$  | 9.11      |



**Figure S20:** DC polarization test at a constant voltage of 1 Volt over a period of 8 hours of the L15 pellet. A smaller inset shows the rapid decrease of current at the beginning of the experiment to achieve a steady state, indicating the low electronic conductivity. The electronic transference number is  $\sim 1.57 \times 10^{-5}$ .

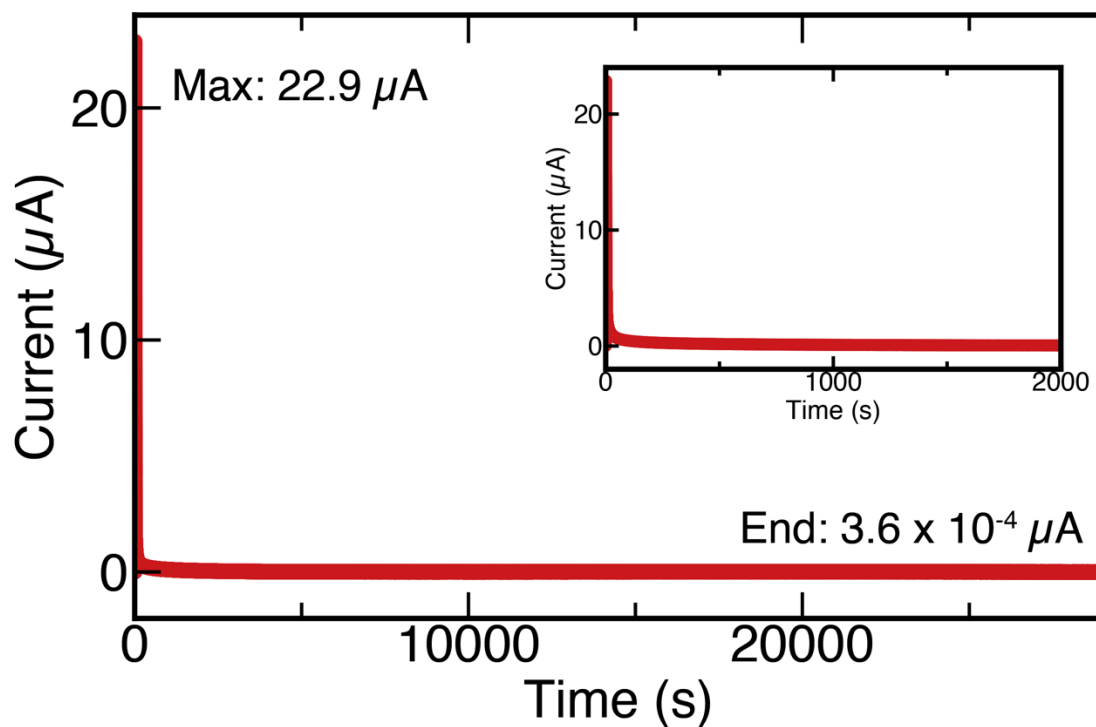

**Table S21:** Fitted parameters of the Nyquist plot of L0 at 193 K (see **Figure S15**). The various values of the equivalence circuit used to fit the Nyquist plot at 193 K are reported in this table, along with its associated error. R element is a resistor, C is a capacitor, and CPE is a constant phase element modeling the pseudo-capacitance experienced by the bulk and grain boundaries in the Nyquist plot.

| <b>Circuit Element</b> | <b>Fitted value</b>    | <b>Error (%)</b> |
|------------------------|------------------------|------------------|
| R1 ( $\Omega$ )        | 3263                   | 5.87             |
| R2 ( $\Omega$ )        | $1.16 \times 10^4$     | 8.33             |
| C2 (F)                 | $2.40 \times 10^{-11}$ | 6.84             |
| R3 ( $\Omega$ )        | $1.69 \times 10^4$     | 11.99            |
| CPE3 (F)               | $1.71 \times 10^{-9}$  | 58.27            |
| R4 ( $\Omega$ )        | $4.48 \times 10^6$     | 3.99             |
| C4 (F)                 | $8.99 \times 10^{-10}$ | 1.87             |
| R5 ( $\Omega$ )        | $9.88 \times 10^6$     | 1.87             |
| C4 (F)                 | $1.92 \times 10^{-9}$  | 4.04             |
| CPE6 (F)               | $2.14 \times 10^{-8}$  | 1.27             |

## References

- [1] F. Lalère *et al.*, “Improving the energy density of  $\text{Na}_3\text{V}_2(\text{PO}_4)_3$ -based positive electrodes through V/Al substitution,” *Journal of Materials Chemistry A*, vol. 3, no. 31, pp. 16198–16205, 2015.
- [2] F. Fauth, I. Peral, C. Popescu, and M. Knapp, “The new material science powder diffraction beamline at Alba Synchrotron,” *Powder Diffraction*, vol. 28, no. S2, 2013.
- [3] J. Rodriguez-Carvajal, “FULLPROF: a program for Rietveld refinement and pattern matching analysis,” in *satellite meeting on powder diffraction of the XV congress of the IUCr*, 1990, vol. 127.
- [4] R. Dovesi, A. Erba, R. Orlando, C. M. Zicovich-Wilson, B. Civalleri, L. Maschio, M. Rérat, S. Casassa, J. Baima, S. Salustro, and B. Kirtman, “Quantum-mechanical condensed matter simulations with Crystal,” *WIREs Computational Molecular Science*, vol. 8, no. 4, 2018.
- [5] R. Dovesi, C. Roetti, C. Freyria-Fava, M. Prencipe, and V. R. Saunders, “On the elastic properties of lithium, sodium and potassium oxide. an ab initio study,” *Chemical Physics*, vol. 156, no. 1, pp. 11–19, 1991.
- [6] R. Nada, J. B. Nicholas, M. I. McCarthy, and A. C. Hess, “Basis sets for Ab Initio Periodic Hartree-Fock Studies of zeolite/adsorbate interactions: He, Ne, and Ar in silica sodalite,” *International Journal of Quantum Chemistry*, vol. 60, no. 4, pp. 809–820, 1996.
- [7] P. J. Hay and W. R. Wadt, “ab initio effective core potentials for molecular calculations. potentials for K to au including the outermost core orbitals,” *The Journal of Chemical Physics*, vol. 82, no. 1, pp. 299–310, 1985.
- [8] T. Bredow and M. Lerch, “Anion distribution in  $\text{Zr}_2\text{ON}_2$ ,” *Zeitschrift für anorganische und allgemeine Chemie*, vol. 630, no. 13–14, pp. 2262–2266, 2004.
- [9] C. Adamo and V. Barone, “Toward reliable density functional methods without adjustable parameters: The PBE0 model,” *The Journal of Chemical Physics*, vol. 110, no. 13, pp. 6158–6170, 1999.
- [10] M. Ferrero, M. Rérat, R. Orlando, and R. Dovesi, “Coupled perturbed Hartree-Fock for periodic systems: The role of symmetry and related computational aspects,” *The Journal of Chemical Physics*, vol. 128, no. 1, p. 014110, 2008.
- [11] M. Ferrero, M. Rérat, R. Orlando, and R. Dovesi, “The calculation of Static Polarizabilities of 1-3D periodic compounds. the implementation in the crystal code,” *Journal of Computational Chemistry*, vol. 29, no. 9, pp. 1450–1459, 2008.
- [12] M. Ferrero, M. Rérat, B. Kirtman, and R. Dovesi, “Calculation of First and second static hyperpolarizabilities of one- to three-dimensional periodic compounds. implementation in the crystal code.,” *The Journal of Chemical Physics*, vol. 129, no. 24, p. 244110, 2008.
